# Supplementary material for: Extracting Total Anthocyanin from Purple Sweet Potato Using an Effective Ultrasound-Assisted Compound Enzymatic Extraction Technology
Source: MDPI journal article supplement (doi:10.3390/molecules27144344), 2022-07-06
Supplement: s1 [file s1]

Supplementary Materials

# Extracting Total Anthocyanin from Purple Sweet Potato Using an Effective Ultrasound-Assisted Compound Enzymatic Extraction Technology

Fang Wang <sup>1</sup>, Shuo Zhang <sup>1</sup>, Guowei Deng <sup>1,\*</sup>, Kun Xu <sup>1</sup>, Haiyan Xu <sup>2</sup> and Jialei Liu <sup>3,\*</sup>

<sup>1</sup> Sichuan Provincial Key Laboratory for Development and Utilization of Characteristic Horticultural Biological Resources, College of Chemistry and Life Sciences, Chengdu Normal University, Chengdu 611130, China; wangfangbia@163.com (F.W.); 15388114168@163.com (S.Z.); 091044@cdnu.edu.cn (K.X.)

<sup>2</sup> College of Life Sciences, Sichuan Normal University, Chengdu 610101, China; weiliangxhy@163.com

<sup>3</sup> Institute of Environment and Sustainable Development in Agriculture, Chinese Academy of Agricultural Sciences, Beijing 100081, China

\* Correspondence: guoweideng@cdnu.edu.cn (G.D.); liujialei@mail.ipc.ac.cn (J.L.)

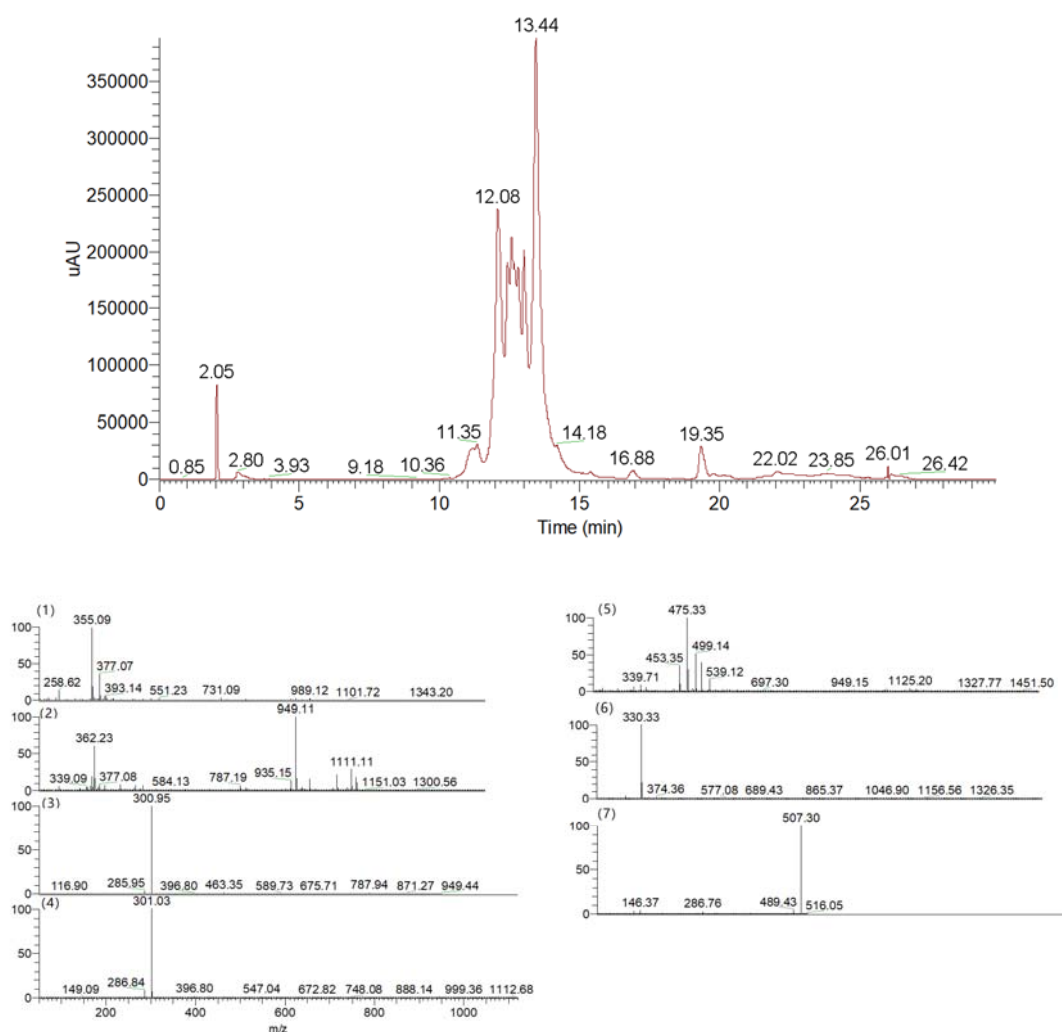

**Figure S1.** UPLC-MS of anthocyanins from the purple sweet potato (Mianzishu 9) extractions.

**Table S1.** Characterisation of anthocyanins in purple sweet potato (Mianzishu 9) using UPLC-MS.

| Peak | RT (time) | M <sup>+</sup> (m/z) | MS <sup>+</sup> (m/z) | Compound                                            | References |
|------|-----------|----------------------|-----------------------|-----------------------------------------------------|------------|
| 1    | 12.08     | 355                  |                       | Malvidin-acetaldehyde                               | [1]        |
| 2    | 12.65     | 1111                 | 949, 787, 362         | Unknown 1                                           |            |
| 3    | 13.10     | 949                  | 787, 463, 301         | Peonidin-3-caffeoyl<br>sophoroside-5-glu-<br>coside | [2]        |
| 4    | 13.30     | 301.03               | -                     | Peonidin                                            | [1]        |
| 5    | 13.44     | 1125                 | 949, 475              | Unknown 2                                           |            |
| 6    | 16.80     | 330.33               | -                     | Malvidin                                            | [1]        |
| 7    | 19.35     | 507                  | 287, 146              | Cyanidin                                            | [1]        |

## References

1. Wang, H.B.; Race, E.J.; Shrikhande, A.J. Characterization of anthocyanins in grape juices by ion trap liquid chromatography-mass spectrometry. *J. Agric. Food Chem.* **2003**, *51*, 1839–1844.
2. Zhu, Z.; Guan, Q.; Koubaa, M.; Barba, F.J.; Roohinejad, S.; Cravotto, G.; Yang, X.; Li, S.; He, J. HPLC-DAD-ESI-MS<sup>2</sup> analytical profile of extracts obtained from purple sweet potato after green ultrasound-assisted extraction. *Food Chem.* **2017**, *215*, 391–400.
